# Supplementary material for: Comparative Genome Characterization of a Petroleum-Degrading Bacillus subtilis Strain DM2
Source: Hindawi journal article supplement (doi:10.1155/2019/7410823), 2019-05-08
Supplement: f1 [file 7410823.f1.pdf]

## Supplementary materials

Table S1 Comparative analysis of COG categories between strain DM2 and strain 168

| COG categories |                                                               | Percentage of proteins % |            |                       |
|----------------|---------------------------------------------------------------|--------------------------|------------|-----------------------|
|                |                                                               | Strain DM2               | Strain 168 | Strain DM2/strain 168 |
| B              | Chromatin structure and dynamics                              | 0.03                     | 0.03       | 0.00                  |
| C              | Energy production and conversion                              | 4.89                     | 5.08       | -3.74                 |
| D              | Cell cycle control, cell division, chromosome partitioning    | 1.61                     | 1.64       | -1.83                 |
| E              | Amino acid transport and metabolism                           | 8.94                     | 9.04       | -1.11                 |
| F              | Nucleotide transport and metabolism                           | 2.98                     | 2.95       | 1.02                  |
| G              | Carbohydrate transport and metabolism                         | 8.76                     | 8.77       | -0.11                 |
| H              | Coenzyme transport and metabolism                             | 5.48                     | 5.69       | -3.69                 |
| I              | Lipid transport and metabolism                                | 4.02                     | 3.87       | 3.88                  |
| J              | Translation, ribosomal structure and biogenesis               | 6.29                     | 6.39       | -1.56                 |
| K              | Transcription                                                 | 8.4                      | 8.4        | 0.00                  |
| L              | Replication, recombination and repair                         | 3.81                     | 3.71       | 2.70                  |
| M              | Cell wall/membrane/envelope biogenesis                        | 5.72                     | 5.69       | 0.53                  |
| N              | Cell motility                                                 | 1.82                     | 1.83       | -0.55                 |
| O              | Posttranslational modification, protein turnover, chaperones  | 3.72                     | 3.62       | 2.76                  |
| P              | Inorganic ion transport and metabolism                        | 5.33                     | 5.36       | -0.56                 |
| Q              | Secondary metabolites biosynthesis, transport and catabolism  | 2.95                     | 2.86       | 3.15                  |
| R              | General function prediction only                              | 8.67                     | 8.86       | -2.14                 |
| S              | Function unknown                                              | 6.73                     | 6.76       | -0.44                 |
| T              | Signal transduction mechanisms                                | 5.07                     | 4.96       | 2.22                  |
| U              | Intracellular trafficking, secretion, and vesicular transport | 0.89                     | 0.91       | -2.20                 |
| V              | Defense mechanisms                                            | 2.74                     | 2.71       | 1.11                  |
| W              | Extracellular structures                                      | 0.12                     | 0.09       | 33.33                 |

Table S2 List of strain DM2-specific proteins versus strains PY97, 168, and MJ01

| Locus    | Proteins                                 | PY97 | 168 | MJ01 |
|----------|------------------------------------------|------|-----|------|
| AXF31570 | ADP-ribosylglycohydrolase family protein | -    | -   | -    |
| AXF31571 | TopI - like protein YobL                 | -    | -   | -    |
| AXF31819 | DUF4365 domain-containing protein        | -    | -   | -    |
| AXF31820 | SMI1/KNR4 family protein                 | -    | -   | -    |
| AXF31827 | DMT family transporter                   | -    | -   | -    |
| AXF31940 | RNA polymerase                           | -    | -   | -    |
| AXF31941 | DUF4179 domain-containing protein        | -    | -   | -    |
| AXF32040 | peptidase S8                             | -    | +   | +    |
| AXF32115 | peptidase G2                             | -    | +   | -    |

|          |                                                  |   |   |   |
|----------|--------------------------------------------------|---|---|---|
| AXF32201 | DUF2812 domain-containing protein                | - | - | - |
| AXF32202 | PadR family transcriptional regulator            | - | + | + |
| AXF32207 | LPXTG cell wall anchor domain-containing protein | - | - | - |
| AXF32342 | gfo/Idh/MocA family oxidoreductase               | - | - | - |
| AXF32475 | site-specific integrase                          | - | - | + |
| AXF32479 | XRE family transcriptional regulator             | - | + | + |
| AXF32480 | XRE family transcriptional regulator             | - | + | + |
| AXF32481 | DNA-binding protein                              | - | + | + |
| AXF32482 | phage regulatory protein                         | - | - | - |
| AXF32483 | XRE family transcriptional regulator             | - | + | + |
| AXF32501 | Fis family transcriptional regulator             | - | - | + |
| AXF32508 | PBSX family phage terminase large subunit        | - | - | - |
| AXF32509 | phage portal protein                             | - | + | + |
| AXF32510 | DUF4355 domain-containing protein                | - | - | - |
| AXF32511 | P22 coat protein - protein 5 domain protein      | - | - | - |
| AXF32517 | DUF3383 family protein                           | - | - | - |
| AXF32518 | DUF3277 domain-containing protein                | - | - | - |
| AXF32520 | LysM domain-containing protein                   | - | - | - |
| AXF32524 | DUF2634 domain-containing protein                | - | - | - |
| AXF32525 | baseplate J/gp47 family protein                  | - | - | - |
| AXF32528 | XkdX family protein                              | - | - | - |
| AXF32530 | phage holin                                      | - | - | + |
| AXF32531 | N-acetylmuramoyl-L-alanine amidase               | - | + | + |
| AXF32536 | DUF4065 domain-containing protein                | - | - | - |
| AXF32537 | YolD-like family protein                         | - | - | - |
| AXF32567 | DNA adenine methylase                            | - | - | - |
| AXF32619 | lytic transglycosylase                           | - | + | + |
| AXF32749 | dipeptide epimerase                              | - | - | + |
| AXF33005 | ABC transporter ATP-binding protein              | - | + | + |
| AXF33204 | sugar porter family MFS transporter              | - | - | - |
| AXF33205 | gfo/Idh/MocA family oxidoreductase               | - | - | - |
| AXF33206 | AP endonuclease                                  | - | - | - |
| AXF33207 | LacI family transcriptional regulator            | - | + | + |
| AXF33239 | tetratricopeptide repeat protein                 | - | - | - |
| AXF33328 | DUF559 domain-containing protein                 | - | - | - |
| AXF33330 | small acid-soluble spore protein                 | - | - | - |
| AXF33336 | DUF1643 domain-containing protein                | - | - | - |
| AXF33338 | VanZ family protein                              | - | - | - |
| AXF33341 | class 1b ribonucleoside-diphosphate reductase    | - | - | + |
| AXF33348 | DUF1653 domain-containing protein                | - | - | - |
| AXF33357 | DNA cytosine methyltransferase                   | - | - | - |
| AXF33358 | HNH endonuclease                                 | - | + | - |
| AXF33457 | phage tail protein                               | - | - | + |
| AXF33463 | phage holin                                      | - | - | + |

|             |                                                            |   |   |   |
|-------------|------------------------------------------------------------|---|---|---|
| AXF33464    | tetratricopeptide repeat protein                           | - | - | - |
| AXF33465    | aspartate phosphatase                                      | - | + | + |
| AXF33470    | SMI1/KNR4 family protein                                   | - | - | - |
| AXF33472    | SMI1/KNR4 family protein                                   | - | - | - |
| AXF33770    | HlyC/CorC family transporter                               | - | - | - |
| AXF33897    | putative holin-like toxin                                  | - | - | - |
| AXF33932    | recombinase                                                | - | + | - |
| AXF33947    | sulfurtransferase                                          | - | + | - |
| AXF33976    | GapA-binding peptide SR1P                                  | - | - | - |
| AXF33977    | MFS transporter                                            | - | + | + |
| AXF33978    | 3-oxoacyl-ACP reductase FabG                               | - | - | - |
| AXF33979    | transketolase family protein                               | - | - | - |
| AXF33981    | MFS transporter                                            | - | + | + |
| AXF33982    | MarR family transcriptional regulator                      | - | + | + |
| AXF34228    | LLM class flavin-dependent oxidoreductase                  | - | - | - |
| AXF34461    | competence pheromone ComX                                  | - | - | - |
| AXF34462    | isoprenyl transferase                                      | - | - | + |
| AXF34664    | gallidermin/nisin family lantibiotic                       | - | - | - |
| AXF34665    | Subtilin biosynthesis protein SpaC                         | - | - | - |
| AXF34666    | ABC transporter ATP-binding protein                        | - | + | + |
| AXF34667    | Subtilin biosynthesis protein SpaB                         | - | - | - |
| AXF34680    | zinc-ribbon domain-containing protein                      | - | - | - |
| AXF35017    | bacteriocin-like protein SboX                              | - | - | - |
| AXF35033    | ABC transporter ATP-binding protein                        | - | + | + |
| AXF35132    | XRE family transcriptional regulator                       | - | + | + |
| AXF35133    | carboxymuconolactone decarboxylase family                  | - | - | - |
| AXF35134    | MFS transporter                                            | - | + | + |
| AXF35214    | DUF4176 domain-containing protein                          | - | - | - |
| AXF35268    | bacteriocin, lactococcin A1 family protein                 | - | - | - |
| AXF35269    | bacteriocin, lactobin A family protein                     | - | - | - |
| AXF35270    | peptide cleavage/export ABC transporter                    | - | - | - |
| AXF35271    | HlyD family efflux transporter periplasmic adaptor subunit | - | - | - |
| AXF35342    | MerR family transcriptional regulator                      | - | + | + |
| AXF35401    | DUF3427 domain-containing protein                          | - | - | - |
| AXF35407    | abhydrolase domain-containing 18                           | - | - | - |
| AXF35466    | XRE family transcriptional regulator                       | - | + | + |
| AXF35483    | site-specific integrase                                    | - | - | + |
| AXF35511    | FadR family transcriptional regulator                      | - | - | - |
| AXF35570    | GlsB/YeaQ/YmgE family stress response membrane protein     | - | - | - |
| DS740_01150 | pseudo                                                     | - | - | - |

Note: + indicates the existence of this gene in the strain; - indicates the lack of this gene in the strain.
